# Nucleic acid biomarkers of immune response and cell and tissue damage in COVID-19 and MIS-C

**Authors:** Conor J. Loy<sup>1#</sup>, Alicia Sotomayor-Gonzalez<sup>2#</sup>, Venice Servellita<sup>2#</sup>, Jenny Nguyen<sup>2</sup>, Joan Lenz<sup>1</sup>, Sanchita Bhattacharya<sup>2</sup>, Meagan Williams<sup>3</sup>, Alexandre P. Cheng<sup>1</sup>, Andrew Bliss<sup>1</sup>, Prachi Saldhi<sup>2</sup>, Noah Brazer<sup>2</sup>, Jessica Streithorst<sup>2</sup>, William Suslovic<sup>3</sup>, Charlotte Hsieh<sup>2</sup>, Burak Bahar<sup>3</sup>, Nathan Wood<sup>2</sup>, Abiodun Foresythe<sup>2</sup>, Amelia Gliwa<sup>2</sup>, Kushmita Bhakta<sup>4</sup>, Maria A. Perez<sup>4</sup>, Laila Hussaini<sup>4</sup>, Evan J. Anderson<sup>4</sup>, Ann Chahrودي<sup>4</sup>, Meghan Delaney<sup>3</sup>, Atul J. Butte<sup>2</sup>, Roberta DeBiasi<sup>3</sup>, Christina A. Rostad<sup>4</sup>, Iwijn De Vlaminck<sup>1#</sup>, Charles Y. Chiu<sup>2#</sup>

## Affiliations:

<sup>1</sup> Meinig School of Biomedical Engineering, Cornell University

<sup>2</sup> UCSF / Benioff Children's Hospital Oakland

<sup>3</sup> Children's National Hospital

<sup>4</sup> Emory University School of Medicine / Children's Healthcare of Atlanta

#These authors contributed equally

Correspondence: [charles.chiu@ucsf.edu](mailto:charles.chiu@ucsf.edu), [id93@cornell.edu](mailto:id93@cornell.edu)

The authors have withdrawn their manuscript owing to data from patients who had not been consented being inadvertently used in the preprint. This has been corrected in the version of the study published in Cell Reports Medicine. Therefore, the authors do not wish this work to be cited as reference for the project. If you have any questions, please contact the corresponding author.
